# Supplementary material for: Right-to-Left Shunt in Divers with Neurological Decompression Sickness: A Systematic Review and Meta-Analysis
Source: MDPI journal article supplement (doi:10.3390/healthcare11101407), 2023-05-12
Supplement: s1 [file s1]

**Supplementary Table 1.** Risk of bias assessment according to Quality in Prognostic Studies (QUIPS) tool

| Study                 | Study participation | Study attrition | PF measurement | Outcome measurement | Study confounding | Statistical analysis and reporting |
|-----------------------|---------------------|-----------------|----------------|---------------------|-------------------|------------------------------------|
| Cantais 2003          | Low                 | Low             | Moderate       | Moderate            | Moderate          | Low                                |
| Cartoni 2004          | Moderate            | Low             | Low            | Moderate            | Moderate          | Low                                |
| Gempp 2008            | Moderate            | Low             | Moderate       | Low                 | Moderate          | Low                                |
| Gempp 2017            | Low                 | Low             | Moderate       | Low                 | High              | Low                                |
| Germonpre 1998        | Low                 | Low             | Low            | Low                 | Moderate          | Low                                |
| Koch 2008             | Low                 | Low             | Moderate       | Low                 | Moderate          | High                               |
| Liou 2015             | Moderate            | Low             | Low            | Low                 | High              | Low                                |
| Torti 2004            | Low                 | Low             | Low            | Low                 | Moderate          | Low                                |
| Wilmschurst 1989      | Moderate            | Low             | Low            | Moderate            | Moderate          | Moderate                           |
| Wilmschurst 2000      | Moderate            | Low             | Low            | Moderate            | Moderate          | Moderate                           |
| Germonpre 2021        | Moderate            | Low             | Moderate       | Low                 | Moderate          | Low                                |
| Balestra 2021         | Low                 | Low             | Low            | Low                 | Moderate          | Low                                |
| Gempp 2010            | Low                 | Low             | Moderate       | Low                 | Moderate          | Low                                |
| Gerriets 2003         | Moderate            | Low             | Moderate       | Low                 | Moderate          | Low                                |
| Knauth 1997           | Moderate            | Low             | Moderate       | Low                 | Moderate          | Low                                |
| Koch 2004             | Moderate            | Low             | Low            | Low                 | Moderate          | Low                                |
| PF: prognostic factor |                     |                 |                |                     |                   |                                    |
